# Supplementary material
Source: publisher figshare collection journal article supplement (https://acs.figshare.com/ndownloader/files/4042855)
Supplement: Supplementary file 1 [file 4042855]

 
data_ardppg_0m 
 
_audit_creation_method            SHELXL-97 
_chemical_name_systematic 
; 
 ? 
; 
_chemical_name_common             ? 
_chemical_melting_point           ? 
_chemical_formula_moiety          ? 
_chemical_formula_sum 
 'C22 H16 N2 O6' 
_chemical_formula_weight          404.37
 
loop_ 
 _atom_type_symbol 
 _atom_type_description 
 _atom_type_scat_dispersion_real 
 _atom_type_scat_dispersion_imag 
 _atom_type_scat_source 
 'C'  'C'   0.0033   0.0016 
 'International Tables Vol C Tables 4.2.6.8 and 6.1.1.4' 
 'H'  'H'   0.0000   0.0000 
 'International Tables Vol C Tables 4.2.6.8 and 6.1.1.4' 
 'N'  'N'   0.0061   0.0033 
 'International Tables Vol C Tables 4.2.6.8 and 6.1.1.4' 
 'O'  'O'   0.0106   0.0060 
 'International Tables Vol C Tables 4.2.6.8 and 6.1.1.4' 
 
_symmetry_cell_setting            'Triclinic'
_symmetry_space_group_name_H-M     P-1
 
loop_ 
 _symmetry_equiv_pos_as_xyz 
 'x, y, z' 
 '-x, -y, -z' 
 
_cell_length_a                    7.2522(9) 
_cell_length_b                    8.0370(10) 
_cell_length_c                    16.347(2) 
_cell_angle_alpha                 82.145(4) 
_cell_angle_beta                  85.415(4) 
_cell_angle_gamma                 75.178(4) 
_cell_volume                      911.4(2) 
_cell_formula_units_Z             2 
_cell_measurement_temperature     296(2) 
_cell_measurement_reflns_used     ? 
_cell_measurement_theta_min       ? 
_cell_measurement_theta_max       ? 
 
_exptl_crystal_description        rectangulaR 
_exptl_crystal_colour             white 
_exptl_crystal_size_max           0.22 
_exptl_crystal_size_mid           0.17 
_exptl_crystal_size_min           0.05 
_exptl_crystal_density_meas       ? 
_exptl_crystal_density_diffrn     1.473 
_exptl_crystal_density_method     'not measured' 
_exptl_crystal_F_000              420 
_exptl_absorpt_coefficient_mu     0.109
_exptl_absorpt_correction_type    ? 
_exptl_absorpt_correction_T_min   ? 
_exptl_absorpt_correction_T_max   ? 
_exptl_absorpt_process_details    ? 
 
_exptl_special_details 
; 
 ? 
; 
 
_diffrn_ambient_temperature       296(2) 
_diffrn_radiation_wavelength      0.71073 
_diffrn_radiation_type            MoK\a 
_diffrn_radiation_source          'fine-focus sealed tube' 
_diffrn_radiation_monochromator   graphite 
_diffrn_measurement_device_type   ? 
_diffrn_measurement_method        ? 
_diffrn_detector_area_resol_mean  ? 
_diffrn_reflns_number             11105 
_diffrn_reflns_av_R_equivalents   0.0249 
_diffrn_reflns_av_sigmaI/netI     0.0283 
_diffrn_reflns_limit_h_min        -8 
_diffrn_reflns_limit_h_max        9 
_diffrn_reflns_limit_k_min        -10 
_diffrn_reflns_limit_k_max        10 
_diffrn_reflns_limit_l_min        -20 
_diffrn_reflns_limit_l_max        20 
_diffrn_reflns_theta_min          1.26 
_diffrn_reflns_theta_max          26.46 
_reflns_number_total              3627 
_reflns_number_gt                 2720 
_reflns_threshold_expression      >2sigma(I) 
 
_computing_data_collection        'Bruker APEX2' 
_computing_cell_refinement        'Bruker SAINT' 
_computing_data_reduction         'Bruker SAINT' 
_computing_structure_solution     'SHELXS-97 (Sheldrick, 2008)' 
_computing_structure_refinement   'SHELXL-97 (Sheldrick, 2008)' 
_computing_molecular_graphics     'Bruker SHELXTL' 
_computing_publication_material   'Bruker SHELXTL' 
 
_refine_special_details 
; 
 Refinement of F^2^ against ALL reflections.  The weighted R-factor wR and 
 goodness of fit S are based on F^2^, conventional R-factors R are based 
 on F, with F set to zero for negative F^2^. The threshold expression of 
 F^2^ > 2sigma(F^2^) is used only for calculating R-factors(gt) etc. and is 
 not relevant to the choice of reflections for refinement.  R-factors based 
 on F^2^ are statistically about twice as large as those based on F, and R- 
 factors based on ALL data will be even larger. 
; 
 
_refine_ls_structure_factor_coef  Fsqd  
_refine_ls_matrix_type            full 
_refine_ls_weighting_scheme       calc  
_refine_ls_weighting_details 
 'calc w=1/[\s^2^(Fo^2^)+(0.1000P)^2^+0.0000P] where P=(Fo^2^+2Fc^2^)/3' 
_atom_sites_solution_primary      direct 
_atom_sites_solution_secondary    difmap 
_atom_sites_solution_hydrogens    geom 
_refine_ls_hydrogen_treatment     mixed 
_refine_ls_extinction_method      none 
_refine_ls_extinction_coef        ? 
_refine_ls_number_reflns          3627 
_refine_ls_number_parameters      274 
_refine_ls_number_restraints      1 
_refine_ls_R_factor_all           0.0737 
_refine_ls_R_factor_gt            0.0567 
_refine_ls_wR_factor_ref          0.2164 
_refine_ls_wR_factor_gt           0.2046 
_refine_ls_goodness_of_fit_ref    1.466 
_refine_ls_restrained_S_all       1.466 
_refine_ls_shift/su_max           0.111 
_refine_ls_shift/su_mean          0.029 
 
loop_ 
 _atom_site_label 
 _atom_site_type_symbol 
 _atom_site_fract_x 
 _atom_site_fract_y 
 _atom_site_fract_z 
 _atom_site_U_iso_or_equiv 
 _atom_site_adp_type 
 _atom_site_occupancy 
 _atom_site_symmetry_multiplicity 
 _atom_site_calc_flag 
 _atom_site_refinement_flags 
 _atom_site_disorder_assembly 
 _atom_site_disorder_group 
O1 O 0.9052(2) 0.1591(2) 0.06210(10) 0.0448(5) Uani 1 1 d . . . 
O2 O 0.4596(2) 0.0108(2) 0.19848(10) 0.0465(5) Uani 1 1 d . . . 
H2 H 0.3680 0.0269 0.1695 0.070 Uiso 1 1 calc R . . 
O3 O 1.0968(2) 0.0348(2) 0.16255(11) 0.0480(5) Uani 1 1 d . . . 
C4 C 0.5717(3) 0.1606(3) 0.07282(14) 0.0362(5) Uani 1 1 d . . . 
C2 C 0.7758(3) 0.0262(3) 0.18787(13) 0.0339(5) Uani 1 1 d . . . 
C5 C 0.7282(3) 0.2051(3) 0.02915(14) 0.0399(6) Uani 1 1 d . . . 
C3 C 0.6017(3) 0.0637(3) 0.15419(13) 0.0337(5) Uani 1 1 d . . . 
C1 C 0.9342(3) 0.0708(3) 0.13974(14) 0.0362(5) Uani 1 1 d . . . 
C8 C 0.5386(4) 0.3490(4) -0.08347(17) 0.0574(7) Uani 1 1 d . . . 
H8 H 0.5269 0.4115 -0.1358 0.069 Uiso 1 1 calc R . . 
C6 C 0.3947(4) 0.2143(3) 0.03589(15) 0.0460(6) Uani 1 1 d . . . 
H6 H 0.2875 0.1864 0.0635 0.055 Uiso 1 1 calc R . . 
C9 C 0.7132(4) 0.2979(3) -0.04888(16) 0.0514(7) Uani 1 1 d . . . 
H9 H 0.8199 0.3251 -0.0774 0.062 Uiso 1 1 calc R . . 
C7 C 0.3798(4) 0.3087(4) -0.04136(16) 0.0550(7) Uani 1 1 d . . . 
H7 H 0.2619 0.3454 -0.0653 0.066 Uiso 1 1 calc R . . 
C13 C 1.1155(4) -0.3032(3) 0.29736(16) 0.0492(6) Uani 1 1 d . . . 
C14 C 0.9345(4) -0.2526(3) 0.26871(14) 0.0415(6) Uani 1 1 d . . . 
C12 C 1.0758(4) -0.0437(3) 0.35478(15) 0.0446(6) Uani 1 1 d . . . 
C10 C 0.8114(3) -0.0713(3) 0.27349(14) 0.0354(5) Uani 1 1 d . . . 
H10 H 0.6875 -0.0820 0.2992 0.042 Uiso 1 1 calc R . . 
C11 C 0.8979(3) 0.0207(3) 0.32901(14) 0.0389(6) Uani 1 1 d . . . 
O4 O 1.1935(2) -0.1923(3) 0.33526(12) 0.0580(5) Uani 1 1 d . . . 
O5 O 0.6251(3) 0.2487(3) 0.33658(15) 0.0741(7) Uani 1 1 d . . . 
N2 N 1.1584(4) 0.0365(4) 0.40559(14) 0.0659(8) Uani 1 1 d D . . 
N1 N 0.8763(5) 0.2512(3) 0.41163(15) 0.0702(8) Uani 1 1 d . . . 
C16 C 0.7697(8) 0.4153(5) 0.4419(2) 0.1182(18) Uani 1 1 d . . . 
H16A H 0.8314 0.4347 0.4882 0.177 Uiso 1 1 calc R . . 
H16B H 0.6415 0.4086 0.4586 0.177 Uiso 1 1 calc R . . 
H16C H 0.7666 0.5093 0.3985 0.177 Uiso 1 1 calc R . . 
C17 C 0.8708(5) -0.3746(3) 0.23387(17) 0.0624(8) Uani 1 1 d . . . 
H17 H 0.7479 -0.3449 0.2148 0.075 Uiso 1 1 calc R . . 
C22 C 1.0595(7) 0.1848(5) 0.43707(18) 0.0806(12) Uani 1 1 d . . . 
C21 C 0.7867(4) 0.1788(3) 0.35674(16) 0.0517(7) Uani 1 1 d . . . 
C20 C 1.2324(5) -0.4676(4) 0.2910(2) 0.0767(11) Uani 1 1 d . . . 
H20 H 1.3548 -0.4997 0.3108 0.092 Uiso 1 1 calc R . . 
C19 C 1.1618(8) -0.5827(4) 0.2544(2) 0.1002(17) Uani 1 1 d . . . 
H19 H 1.2379 -0.6931 0.2487 0.120 Uiso 1 1 calc R . . 
C18 C 0.9822(8) -0.5350(4) 0.2269(2) 0.0910(14) Uani 1 1 d . . . 
H18 H 0.9354 -0.6135 0.2030 0.109 Uiso 1 1 calc R . . 
O6 O 1.1307(5) 0.2511(4) 0.48440(16) 0.1276(14) Uani 1 1 d . . . 
C23 C 1.3583(5) -0.0328(6) 0.4286(2) 0.1029(16) Uani 1 1 d D . . 
H23A H 1.4275 0.0547 0.4131 0.154 Uiso 1 1 calc R . . 
H23B H 1.4156 -0.1321 0.4003 0.154 Uiso 1 1 calc R . . 
H23C H 1.3622 -0.0662 0.4872 0.154 Uiso 1 1 calc R . . 
 
loop_ 
 _atom_site_aniso_label 
 _atom_site_aniso_U_11 
 _atom_site_aniso_U_22 
 _atom_site_aniso_U_33 
 _atom_site_aniso_U_23 
 _atom_site_aniso_U_13 
 _atom_site_aniso_U_12 
O1 0.0335(9) 0.0588(10) 0.0434(10) 0.0027(8) -0.0009(7) -0.0191(8) 
O2 0.0272(9) 0.0696(11) 0.0443(10) 0.0065(8) -0.0076(7) -0.0204(8) 
O3 0.0259(9) 0.0628(11) 0.0572(11) -0.0045(9) -0.0042(7) -0.0153(8) 
C4 0.0337(12) 0.0364(11) 0.0396(12) -0.0063(9) -0.0038(10) -0.0092(9) 
C2 0.0272(11) 0.0374(11) 0.0384(12) -0.0042(9) -0.0028(9) -0.0103(9) 
C5 0.0378(13) 0.0424(12) 0.0408(13) -0.0072(10) -0.0030(10) -0.0107(10) 
C3 0.0280(11) 0.0366(11) 0.0386(12) -0.0058(9) -0.0020(9) -0.0112(9) 
C1 0.0288(11) 0.0405(12) 0.0422(13) -0.0079(10) -0.0013(9) -0.0122(9) 
C8 0.0699(19) 0.0647(17) 0.0361(14) 0.0053(12) -0.0130(13) -0.0169(15) 
C6 0.0402(14) 0.0542(14) 0.0448(14) -0.0016(11) -0.0099(11) -0.0139(11) 
C9 0.0524(16) 0.0604(16) 0.0425(14) -0.0013(12) 0.0030(12) -0.0198(13) 
C7 0.0509(16) 0.0686(17) 0.0438(15) -0.0010(13) -0.0186(12) -0.0100(13) 
C13 0.0488(15) 0.0474(14) 0.0442(14) 0.0033(11) 0.0026(11) -0.0050(12) 
C14 0.0517(14) 0.0379(12) 0.0349(12) -0.0011(10) -0.0029(10) -0.0126(11) 
C12 0.0434(14) 0.0597(15) 0.0370(13) -0.0007(11) -0.0074(10) -0.0252(12) 
C10 0.0268(11) 0.0405(12) 0.0394(12) -0.0027(9) -0.0043(9) -0.0095(9) 
C11 0.0411(13) 0.0425(12) 0.0365(12) -0.0057(10) -0.0011(10) -0.0165(10) 
O4 0.0336(10) 0.0736(13) 0.0624(12) 0.0034(10) -0.0136(8) -0.0077(9) 
O5 0.0646(14) 0.0548(12) 0.0930(17) -0.0164(11) 0.0101(12) 0.0026(10) 
N2 0.0727(17) 0.103(2) 0.0401(13) 0.0028(13) -0.0156(11) -0.0575(16) 
N1 0.118(2) 0.0635(15) 0.0450(14) -0.0220(11) 0.0126(14) -0.0489(16) 
C16 0.224(5) 0.067(2) 0.078(2) -0.041(2) 0.042(3) -0.061(3) 
C17 0.106(2) 0.0474(15) 0.0416(15) -0.0039(11) -0.0094(15) -0.0323(16) 
C22 0.133(3) 0.101(3) 0.0386(16) -0.0091(17) -0.0036(19) -0.084(3) 
C21 0.0668(19) 0.0465(14) 0.0455(15) -0.0095(11) 0.0102(13) -0.0225(14) 
C20 0.074(2) 0.063(2) 0.0625(19) 0.0150(16) 0.0160(16) 0.0199(17) 
C19 0.168(5) 0.0333(16) 0.067(2) 0.0000(15) 0.041(3) 0.015(2) 
C18 0.176(5) 0.0397(17) 0.057(2) -0.0078(14) 0.005(2) -0.028(2) 
O6 0.217(4) 0.166(3) 0.0574(14) -0.0218(16) -0.0173(17) -0.144(3) 
C23 0.080(2) 0.191(5) 0.064(2) 0.020(2) -0.0345(18) -0.090(3) 
 
_geom_special_details 
; 
 All esds (except the esd in the dihedral angle between two l.s. planes) 
 are estimated using the full covariance matrix.  The cell esds are taken 
 into account individually in the estimation of esds in distances, angles 
 and torsion angles; correlations between esds in cell parameters are only 
 used when they are defined by crystal symmetry.  An approximate (isotropic) 
 treatment of cell esds is used for estimating esds involving l.s. planes. 
; 
 
loop_ 
 _geom_bond_atom_site_label_1 
 _geom_bond_atom_site_label_2 
 _geom_bond_distance 
 _geom_bond_site_symmetry_2 
 _geom_bond_publ_flag 
O1 C1 1.371(3) . ? 
O1 C5 1.374(3) . ? 
O2 C3 1.337(3) . ? 
O3 C1 1.217(3) . ? 
C4 C5 1.391(3) . ? 
C4 C6 1.402(3) . ? 
C4 C3 1.449(3) . ? 
C2 C3 1.364(3) . ? 
C2 C1 1.434(3) . ? 
C2 C10 1.515(3) . ? 
C5 C9 1.384(3) . ? 
C8 C9 1.370(4) . ? 
C8 C7 1.381(4) . ? 
C6 C7 1.378(4) . ? 
C13 C14 1.371(4) . ? 
C13 C20 1.388(4) . ? 
C13 O4 1.401(3) . ? 
C14 C17 1.387(4) . ? 
C14 C10 1.510(3) . ? 
C12 C11 1.340(3) . ? 
C12 O4 1.341(3) . ? 
C12 N2 1.373(3) . ? 
C10 C11 1.509(3) . ? 
C11 C21 1.430(4) . ? 
O5 C21 1.213(3) . ? 
N2 C22 1.368(5) . ? 
N2 C23 1.473(4) . ? 
N1 C22 1.374(5) . ? 
N1 C21 1.413(4) . ? 
N1 C16 1.475(4) . ? 
C17 C18 1.349(5) . ? 
C22 O6 1.211(4) . ? 
C20 C19 1.385(6) . ? 
C19 C18 1.355(6) . ? 
 
loop_ 
 _geom_angle_atom_site_label_1 
 _geom_angle_atom_site_label_2 
 _geom_angle_atom_site_label_3 
 _geom_angle 
 _geom_angle_site_symmetry_1 
 _geom_angle_site_symmetry_3 
 _geom_angle_publ_flag 
C1 O1 C5 121.56(17) . . ? 
C5 C4 C6 118.0(2) . . ? 
C5 C4 C3 117.7(2) . . ? 
C6 C4 C3 124.2(2) . . ? 
C3 C2 C1 119.6(2) . . ? 
C3 C2 C10 122.04(18) . . ? 
C1 C2 C10 118.23(18) . . ? 
O1 C5 C9 117.0(2) . . ? 
O1 C5 C4 121.1(2) . . ? 
C9 C5 C4 121.9(2) . . ? 
O2 C3 C2 118.37(19) . . ? 
O2 C3 C4 121.07(19) . . ? 
C2 C3 C4 120.55(19) . . ? 
O3 C1 O1 116.20(19) . . ? 
O3 C1 C2 124.6(2) . . ? 
O1 C1 C2 119.21(19) . . ? 
C9 C8 C7 120.7(2) . . ? 
C7 C6 C4 120.0(2) . . ? 
C8 C9 C5 118.9(2) . . ? 
C6 C7 C8 120.5(2) . . ? 
C14 C13 C20 122.1(3) . . ? 
C14 C13 O4 122.1(2) . . ? 
C20 C13 O4 115.8(3) . . ? 
C13 C14 C17 117.0(2) . . ? 
C13 C14 C10 121.5(2) . . ? 
C17 C14 C10 121.5(2) . . ? 
C11 C12 O4 124.9(2) . . ? 
C11 C12 N2 123.2(3) . . ? 
O4 C12 N2 112.0(2) . . ? 
C11 C10 C2 113.42(18) . . ? 
C11 C10 C14 110.09(19) . . ? 
C2 C10 C14 110.90(18) . . ? 
C12 C11 C21 118.7(2) . . ? 
C12 C11 C10 121.7(2) . . ? 
C21 C11 C10 119.6(2) . . ? 
C12 O4 C13 117.58(19) . . ? 
C22 N2 C12 121.7(3) . . ? 
C22 N2 C23 116.7(3) . . ? 
C12 N2 C23 121.6(3) . . ? 
C22 N1 C21 125.2(3) . . ? 
C22 N1 C16 116.6(3) . . ? 
C21 N1 C16 118.1(3) . . ? 
C18 C17 C14 121.9(4) . . ? 
O6 C22 N2 121.4(4) . . ? 
O6 C22 N1 123.0(4) . . ? 
N2 C22 N1 115.5(2) . . ? 
O5 C21 N1 120.5(3) . . ? 
O5 C21 C11 123.9(3) . . ? 
N1 C21 C11 115.5(3) . . ? 
C19 C20 C13 118.2(3) . . ? 
C18 C19 C20 120.2(3) . . ? 
C17 C18 C19 120.6(3) . . ? 
 
_diffrn_measured_fraction_theta_max    0.966 
_diffrn_reflns_theta_full              26.46 
_diffrn_measured_fraction_theta_full   0.966 
_refine_diff_density_max    0.235 
_refine_diff_density_min   -0.267 
_refine_diff_density_rms    0.053 
